# Supplementary material for: A simple model for learning in volatile environments
Source: PLOS journal article supplement (doi:10.1371/journal.pcbi.1007963), 2020-07-01
Supplement: S3 (10.1371/journal.pcbi.1007963.s003) [file journal.pcbi.1007963.s003]

Although in the main text, we examined learning rates for binary outcomes in the space of the latent variable where learning occurs, it is also possible, as pointed out by a reviewer, to impute the learning rate implied by each such update in observation space. Here, we consider this alternative metric of learning rate in the observation space,  $\alpha_t^o$ , which is defined as below:

$$\alpha_t^o = \frac{s(m_t) - s(m_{t-1})}{\delta_t}, \quad (1)$$

where  $m_{t-1}$  and  $m_t$  are the old and new mean prediction of the (latent) state variable,  $s(m) = (1 + \exp(-m))^{-1}$  is the sigmoid function, and  $\delta_t$  is the prediction error:

$$\delta_t = o_t - s(m_{t-1}). \quad (2)$$

S1 Fig. shows that unlike the HGFs learning rate in the latent space, this quantity,  $\alpha_t^o$ , increases during blocks of higher volatility in the probabilistic learning task with binary observations, seemingly reflecting the theoretically expected relationship between volatility and learning rate. However, this behavior actually does not arise from the models top-down inferences about volatility, but instead is directly contaminated by differences in prediction errors between the blocks. As shown in the figure, it is present even when the models volatility estimate is held fixed.

Here, we analyze the source of this contamination, demonstrating that  $\alpha_t^o$  is contaminated by the absolute value of prediction error and therefore increases following switches regardless of volatility (and even if volatility is fixed). Both the binary VKF and binary HGF update their estimation according to the following equation:

$$m_t = m_{t-1} + \alpha_t \delta_t, \quad (3)$$

where  $\alpha_t$  is the learning rate as defined in the main text (and plotted in Fig 6). Note that  $\alpha_t$  is different for the VKF and the HGF, but the update rule of  $m_t$  is the same as this equation for both models. Therefore,  $\alpha_t^o$  is given by:

$$\alpha_t^o = \frac{s(m_{t-1} + \alpha_t \delta_t) - s(m_{t-1})}{\delta_t}. \quad (4)$$

The problem arises because the numerator of  $\alpha_t^o$  depends on the second order effects of  $\delta_t$ . To see this, we expand  $s(m_{t-1} + \alpha_t \delta_t)$  using Taylor series around

$m_{t-1}$ :

$$s(m_{t-1} + \alpha_t \delta_t) = s(m_{t-1}) + \alpha_t \delta_t s'(m_{t-1}) + (\alpha_t \delta_t)^2 s''(m_{t-1}) + O(\delta_t^2) \quad (5)$$

where  $O(\delta_t^2)$  contains terms higher than second order, and  $s'$  and  $s''$  are the first and second derivatives of the sigmoid function, respectively. Substituting this equation into the right-hand side of equation (4),  $\alpha_t^o$  becomes:

$$\alpha_t^o = \alpha_t s'(m_{t-1}) + \alpha_t^2 \delta_t s''(m_{t-1}) + O(\delta_t). \quad (6)$$

The first and second derivatives of sigmoid are given by:

$$s'(m) = s(m)(1 - s(m)), \quad (7)$$

and

$$s''(m) = s'(m)(1 - 2s(m)). \quad (8)$$

It can be easily seen that  $s'(m)$  is positive regardless of  $m$ , but the sign of  $s''(m)$  depends on the last term on the right hand side of (8). Therefore, by substituting  $s''$  in equation (6), we see that the sign of second term in (6) depends on  $(1 - 2s(m_{t-1}))\delta_t$ , which is positive and large following switches in probabilistic tasks (e.g. Fig 6). In particular, there are two types of switches:

- $o_t = 1$  and  $m_{t-1}$  is negative and relatively large, then both  $1 - 2s(m_{t-1})$  and  $\delta_t$  are positive and large.
- $o_t = 0$  and  $m_{t-1}$  is positive and relatively large, then both  $1 - 2s(m_{t-1})$  and  $\delta_t$  are negative and large.

Therefore,  $\alpha_t^o$  is influenced by the absolute value of prediction errors,  $|\delta_t|$ , following switches, regardless of volatility and even if volatility or  $\alpha_t$  is fixed (S1 Fig).
